# Supplementary material for: Targeting a Lipid Desaturation Enzyme, SCD1, Selectively Eliminates Colon Cancer Stem Cells through the Suppression of Wnt and NOTCH Signaling
Source: MDPI journal article supplement (doi:10.3390/cells10010106), 2021-01-08

**Supplementary Materials Figure S1.** Decrease of SCD1 did not reduce cell number cultured in bulk condition. siRNA reverse-transfected HT29 BCC (Bulk cultured cells) are plated and counted after 3 days. Mock is without siRNA. siNC is scrambled siRNA for control and siSCD1#1 and siSCD1#2 are siRNAs against SCD1 but with different sequences. All from IDT.

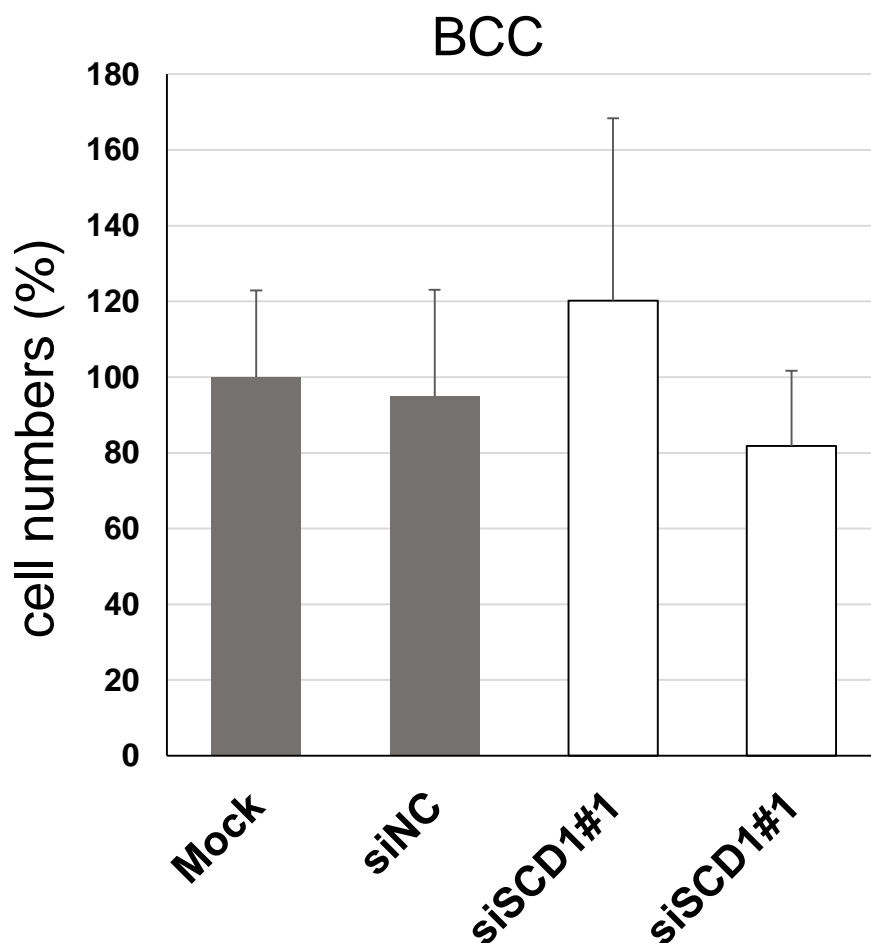

**Supplementary Materials Figure S2.** SCD1 inhibition did not induce apoptosis in BCC (bulk cultured cells). Scanning electron microscope images demonstrate no apoptotic morphologies in BCC by MF-438 or DMSO (control).

**BCC**

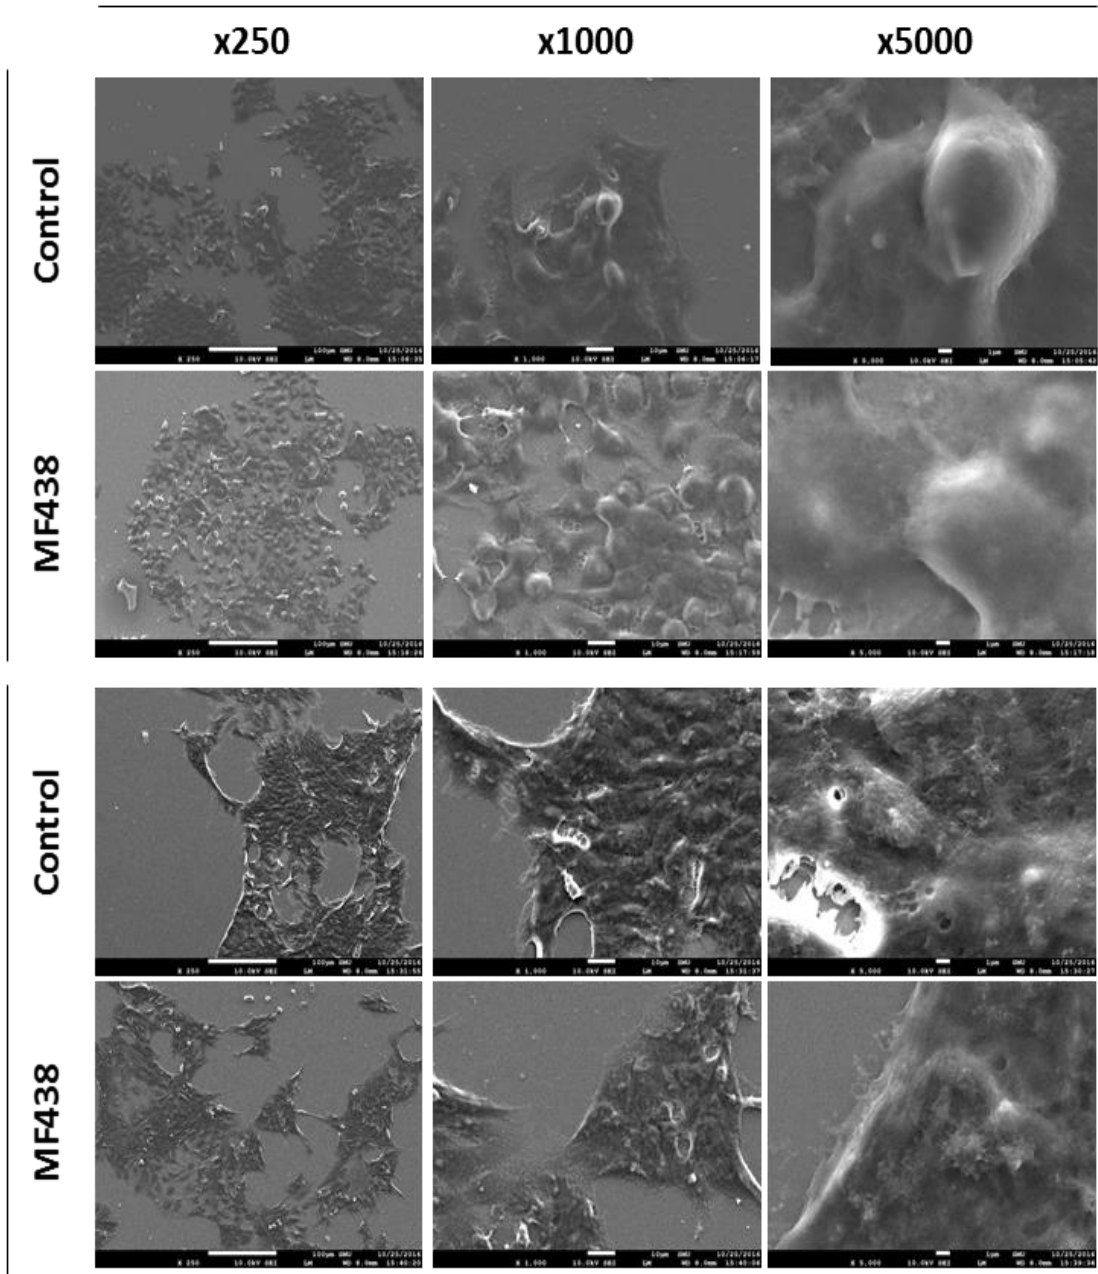

Supplementary Materials Figure S3. Original image of the Western blots used.

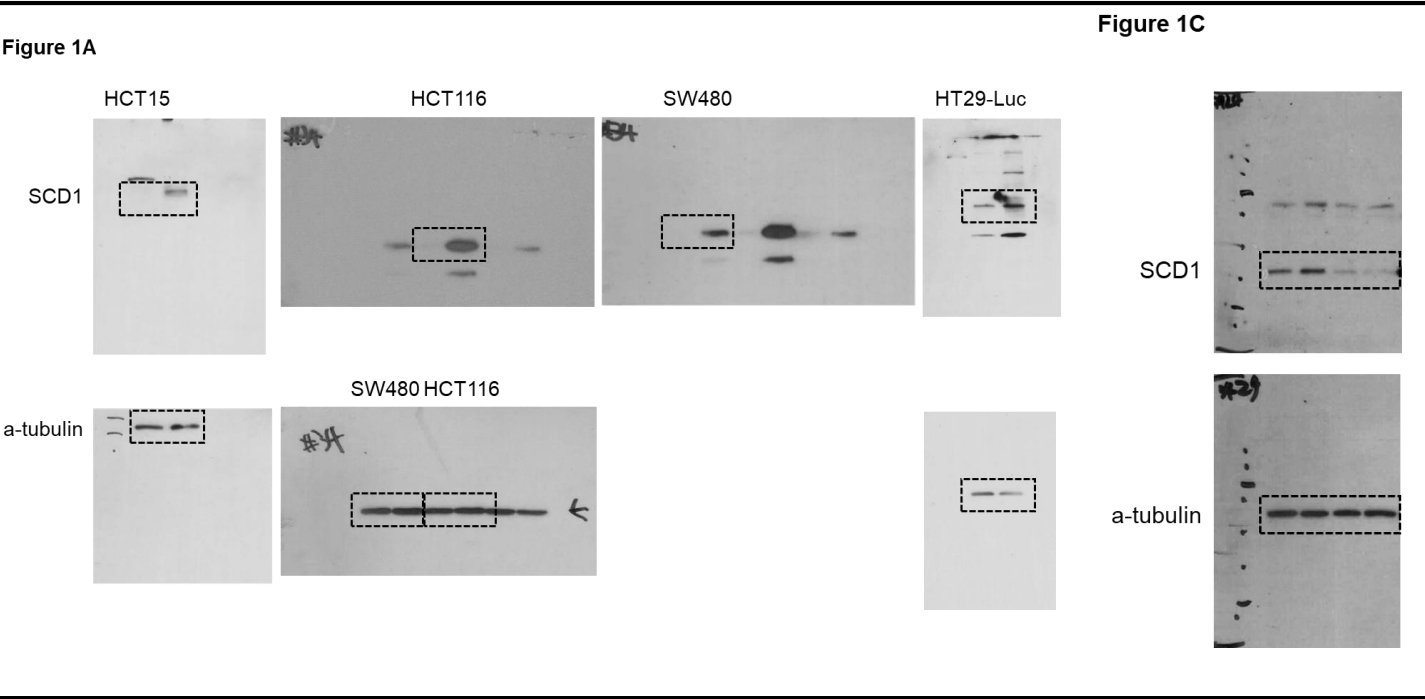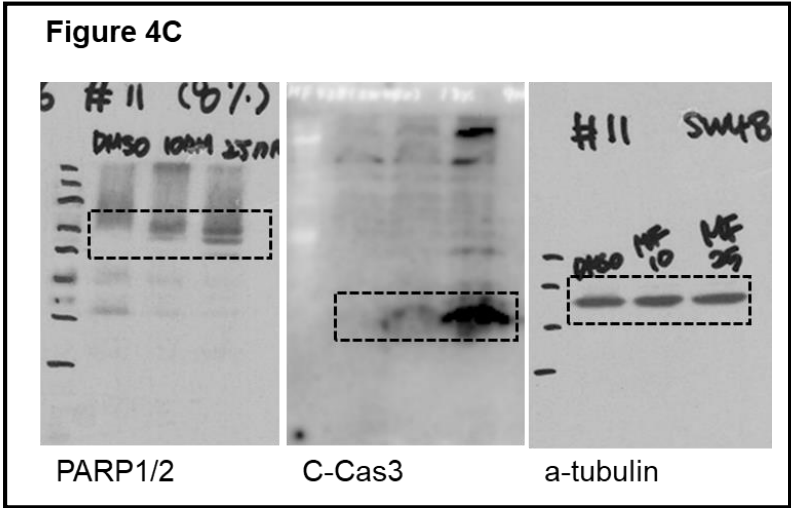

Supplement: s1 [file s1]
